# Supplementary material for: Biocompatible ionic liquid-based formulations for topical delivery of ε-poly- l -lysine to combat subcutaneous fungal infections
Source: Royal Society of Chemistry journal article supplement (doi:10.1039/d5lf00298b), 2025-12-03
Supplement: d5lf00298b1.pdf [file d5lf00298b1.pdf]

## Electronic supplementary information

### Biocompatible Ionic Liquid-Based Formulations for Topical Delivery of $\epsilon$ -Poly-L-Lysine to Combat Subcutaneous Fungal Infections

Muhammad Safaat<sup>a</sup>, Rike Rachmayati<sup>a</sup>, Rie Wakabayashi<sup>a</sup>, Masahiro Goto<sup>a,b</sup>, Noriho Kamiya<sup>a,b\*</sup>

<sup>a</sup> Department of Applied Chemistry, Graduate School of Engineering, Kyushu University, 744 Motooka, Fukuoka 819-0395, Japan.

<sup>b</sup> Division of Biotechnology, Center for Future Chemistry, Kyushu University, 744 Motooka, Fukuoka 819-0395, Japan.

\*Corresponding author. E-mail address: [kamiya.noriho.367@m.kyushu-u.ac.jp](mailto:kamiya.noriho.367@m.kyushu-u.ac.jp)

| No | Table of contents                                                    | Page |
|----|----------------------------------------------------------------------|------|
| 1  | Abbreviation                                                         | S2   |
| 2  | CD Spectra of EPL in different solutions                             | S3   |
| 3  | MALDI-TOF-MS Analysis of unmodified and Fluorescence-labelled EPL    | S4   |
| 4  | FTIR spectrum of IL/Os-treated stratum corneum                       | S5   |
| 5  | Antifungal activity of controls                                      | S6   |
| 6  | Antifungal activity of freshly prepared EPL-loaded IL/O formulations | S7   |
| 7  | Antifungal activity of freshly prepared EPL in PBS                   | S8   |
| 8  | Live/dead assay                                                      | S9   |
| 9  | The long-term therapeutic efficacy of EPL-loaded IL/O formulations   | S10  |
| 10 | The long-term therapeutic efficacy of EPL in PBS                     | S11  |

## 1. Abbreviations

| Abbreviation | Name/description                 |
|--------------|----------------------------------|
| PBS          | Phosphate buffer saline          |
| ILs          | Ionic liquids                    |
| SAILs        | Surface-active ionic liquids     |
| MEFs         | Microemulsion formulations       |
| IL/O         | Ionic liquid-in-oil formulations |
| SC           | Stratum corneum                  |
| FAs          | Fatty acids                      |
| C18:1        | Oleic acid                       |
| EPL          | $\epsilon$ -poly-l-lysine        |
| Span-20      | Sorbitan monolaurate             |
| IPM          | Isopropyl myristate              |
| [Cho][Ole]   | Choline oleate                   |
| [Cho][Pro]   | Choline propionate               |
| PDA          | Potato dextrose agar             |
| pI           | Isoelectric point                |
| Mw           | Molecular weight                 |
| SDS          | Sodium dodecyl sulfate           |
| DLS          | Dynamic light scattering         |
| PDI          | Polydispersity index             |
| FDC          | Franz diffusion cell             |
| FTIR         | Fourier-transform infrared       |

## 2. CD Spectra of EPL in IL

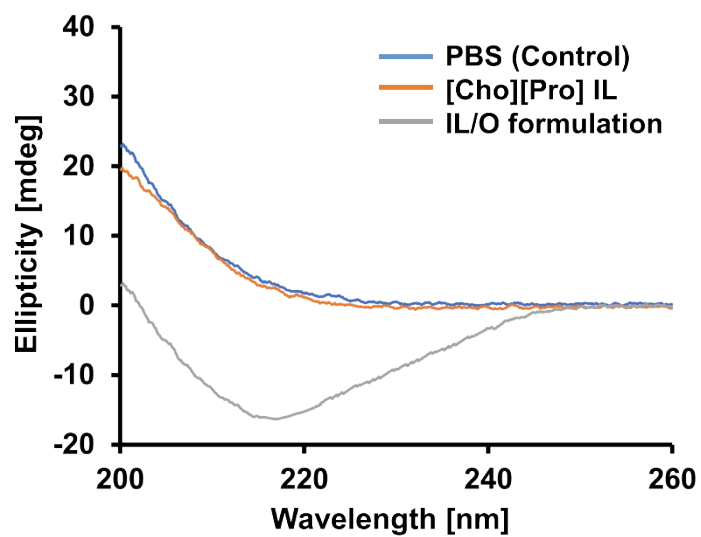

**Figure S1.** CD spectra of EPL in PBS or [Cho][Pro] and that of IL/O formulation at 25 °C.

### 3. MALDI-TOF-MS Analysis of unmodified and Fluorescein-labelled EPL

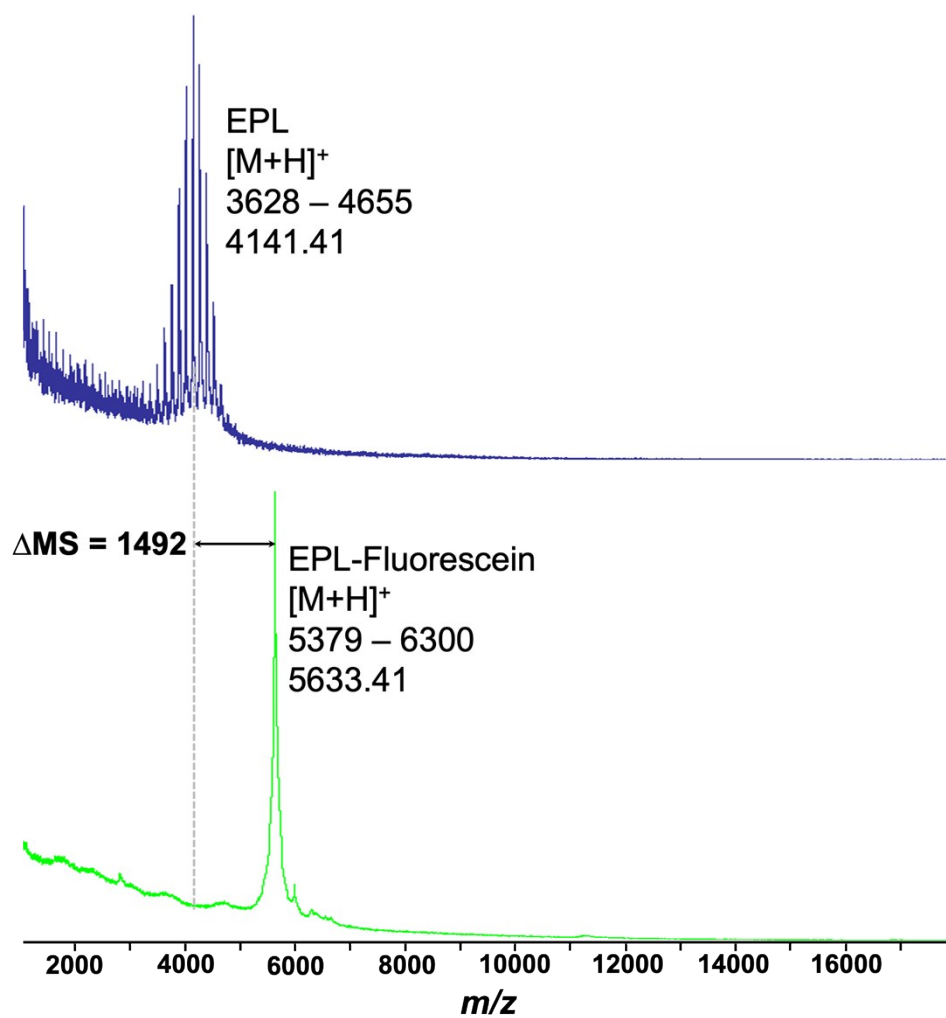

**Figure S2.** MALDI-TOF-MS spectra analysis of EPL and Fluorescein-labelled EPL. The theoretical  $\Delta MS$  for modification with four fluorescein molecules is 1501  $m/z$ .

#### 4. FTIR spectrum of IL/O formulations-treated stratum corneum

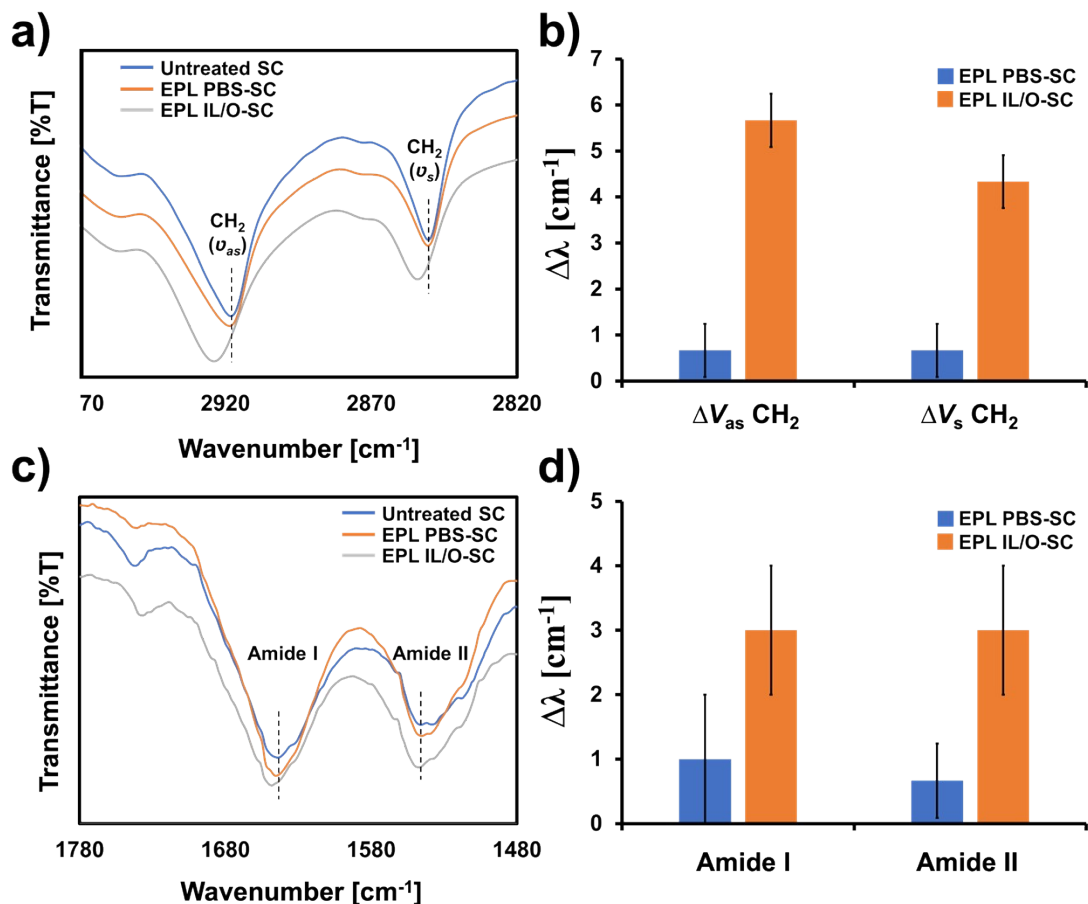

**Figure S3.** Analysis of the skin permeation mechanism. FTIR spectra of mice SC treatment with EPL-loaded IL/O formulations. a) Peaks near 2850 cm<sup>-1</sup> and 2920 cm<sup>-1</sup> correspond to symmetric (ΔV<sub>s</sub>) and asymmetric (ΔV<sub>as</sub>) CH<sub>2</sub> vibrations of the SC lipids, respectively. b) Shifts in symmetric and asymmetric CH<sub>2</sub> stretching peaks relative to untreated SC lipids. c) Peaks near 1630 cm<sup>-1</sup> and 1545 cm<sup>-1</sup> correspond to Amide I and II vibrational modes of the SC protein, respectively. d) Amide I and II vibrational peaks shift compared with nontreated SC protein. This experiment was conducted in triplicate ( $n = 3$ ), mean ± SD.

## 5. Antifungal activity of controls

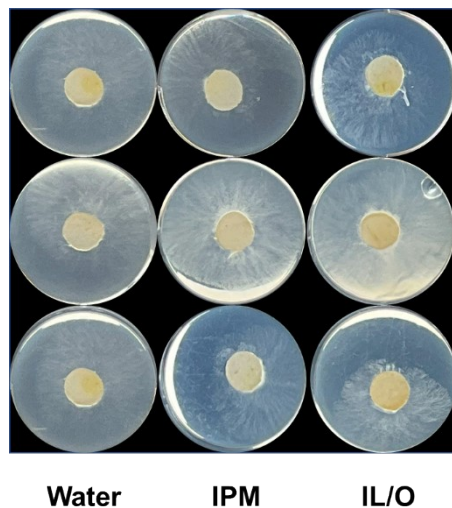

**Figure S4.** The picture of antifungal activity of controls, including water, IPM, and IL/O alone (without EPL) against a fungal strain growing beneath the mice skin, subsequently overlying the freshly prepared sample solutions to the SC containing *Trichoderma viride*. The experiments were conducted in triplicate ( $n = 3$ ) using the skin with *T. viride* in 6-well different microplates.

## 6. Antifungal activity of freshly prepared EPL-loaded MEFs

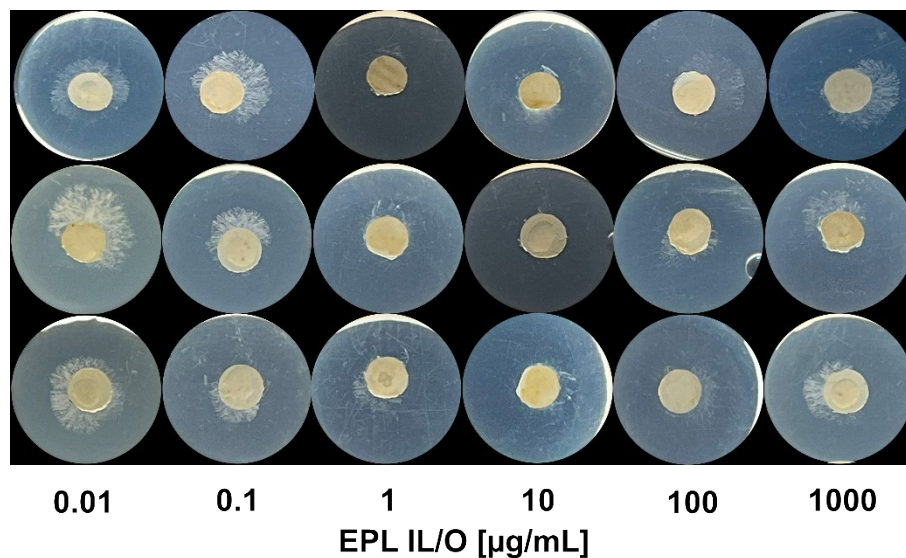

**Figure S5.** The picture of all antifungal activity assay results shown in Figure 4a,c. The antifungal activity of EPL-loaded IL/O formulation against a fungal strain actively growing beneath the skin, subsequently overlying the freshly prepared sample solutions to the SC containing *T. viride*. The experiments were conducted in triplicate ( $n = 3$ ) using the skin containing *T. viride* in 6-well different microplates.

## 7. Antifungal activity of freshly prepared EPL in PBS

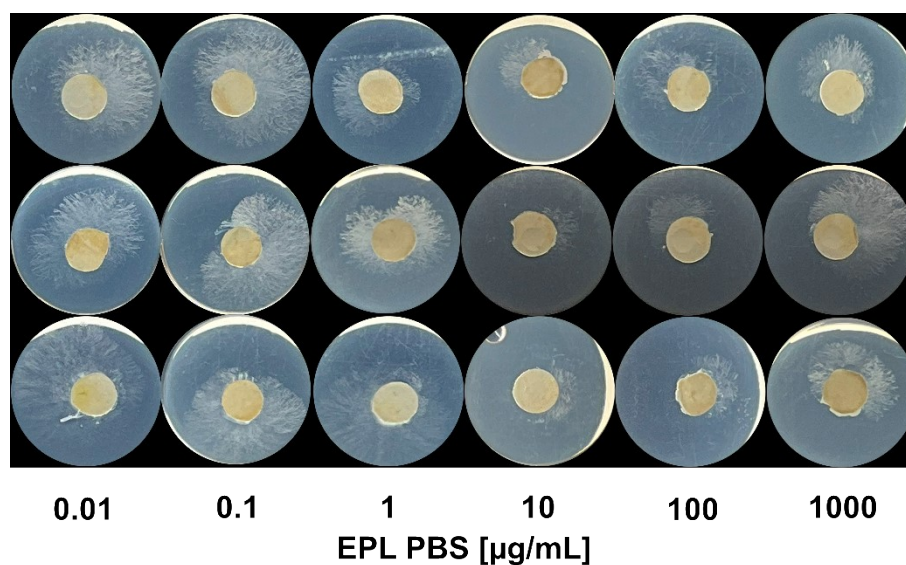

**Figure S6.** Topical antifungal activity results of EPL dissolved in PBS shown in Figure 4b,c. Potato dextrose agar (PDA) plate after subcutaneously growing *T. viride* treated with EPL dissolved in PBS at 25 °C for 12 h. The experiments were conducted in triplicate ( $n = 3$ ) using the skin containing *T. viride* in 6-well different microplates.



## 8. Live/dead assay

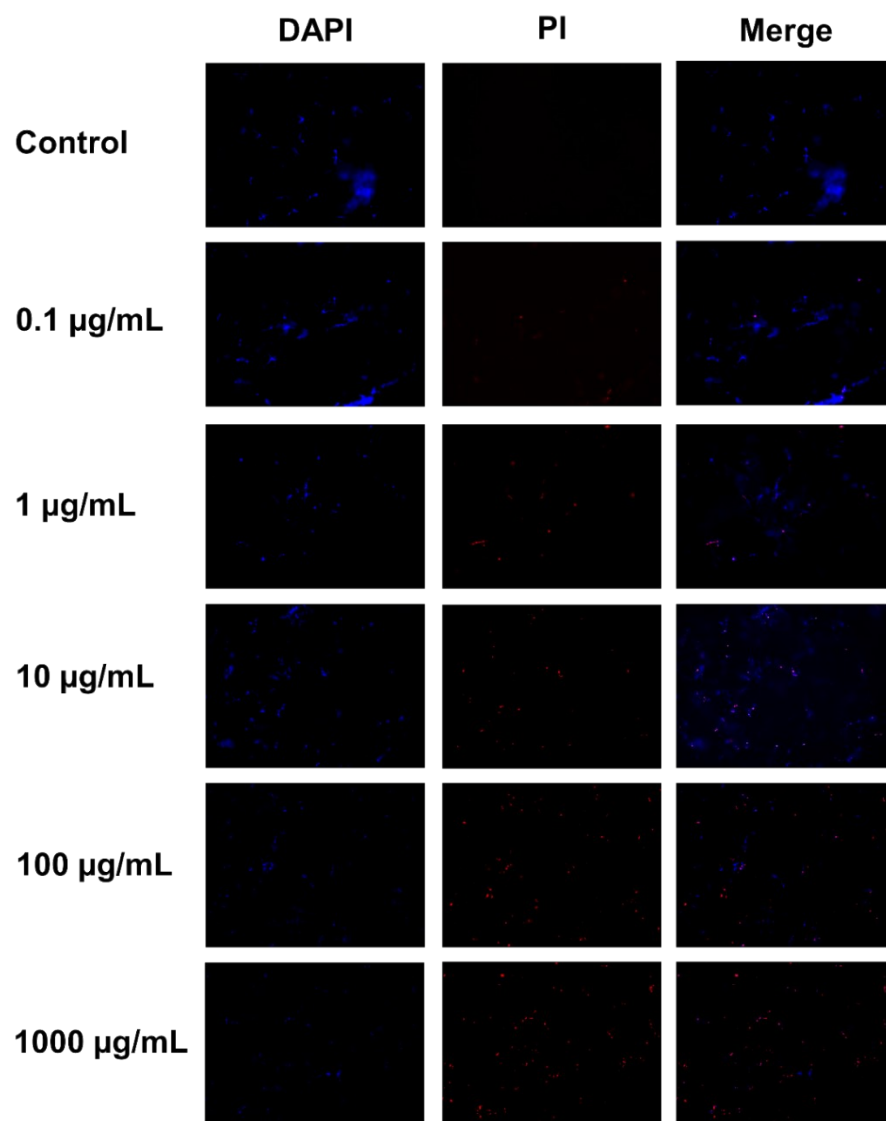

**Figure S7.** Fluorescence microscopy result of dead cell of *T. viride* treated with EPL shown in Figure 4d. Fluorescence microscopy of *T. viride* staining with PI (red, for dead cells) and DAPI (blue, for live cells) after treated with various EPL (0 – 1000  $\mu\text{g/mL}$ ) after 24 h.

## 9. The long-term therapeutic efficacy of EPL-loaded IL/O formulations

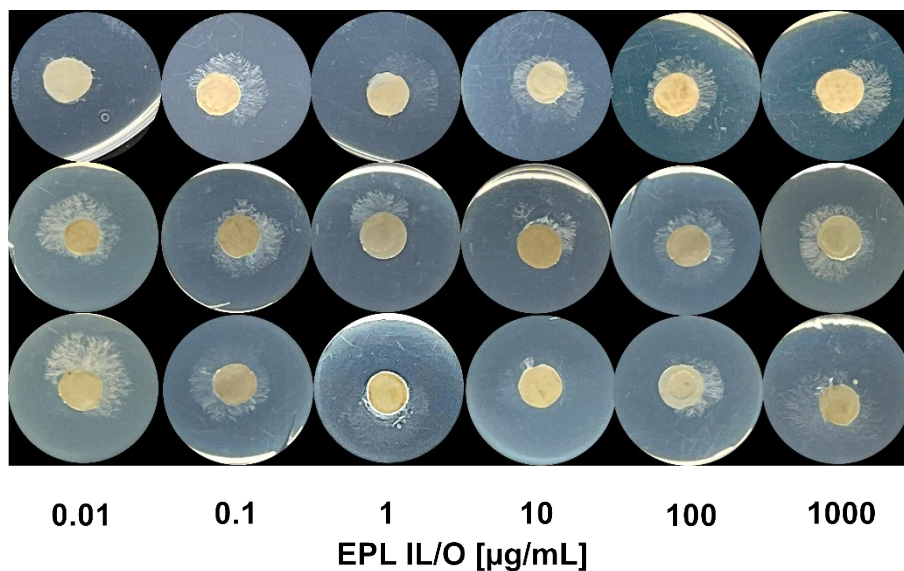

**Figure S8.** The picture of antifungal activity assay using *T. viride* in the topical application to assess the long-term therapeutic efficacy of EPL-loaded IL/O formulations over 28-day of storage at room temperature shown in Figure 6a. The experiments were conducted in triplicate ( $n = 3$ ) in 6-well different microplates.

## 10. The long-term therapeutic efficacy of EPL in PBS

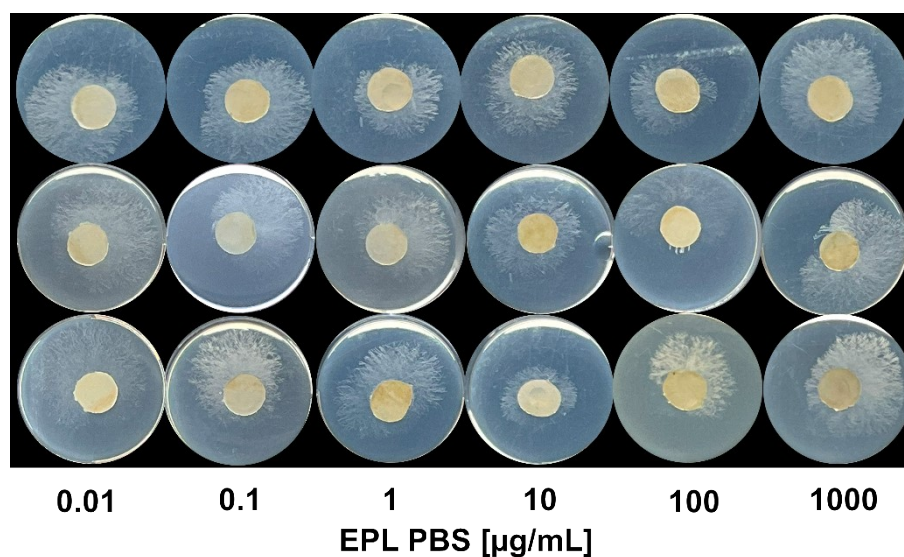

**Figure S9.** The picture of antifungal activity assay using *T. viride* in the topical application to assess the long-term therapeutic efficacy of EPL in PBS over 28-day of storage at room temperature shown in Figure 6b. The experiments were conducted in triplicate ( $n = 3$ ) in 6-well different microplates.
